# Supplementary material
Source: HighWire-hosted journal article supplement (https://mct.aacrjournals.org/content/suppl/2014/01/16/1535-7163.MCT-13-0770)
Supplement: fig_1_to_6_tab_1_to_3.pdf [file fig_1_to_6_tab_1_to_3.pdf]

Supplemental Figure 1

A

(S)-JQ1

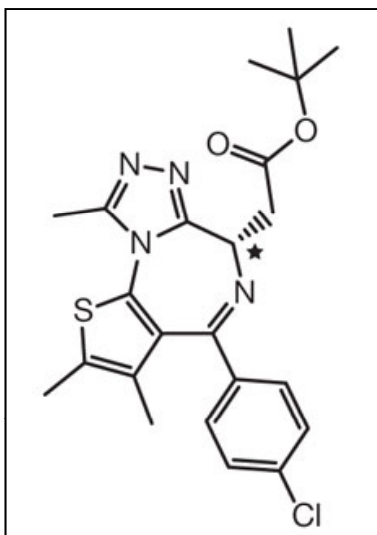

B

(R)-JQ1

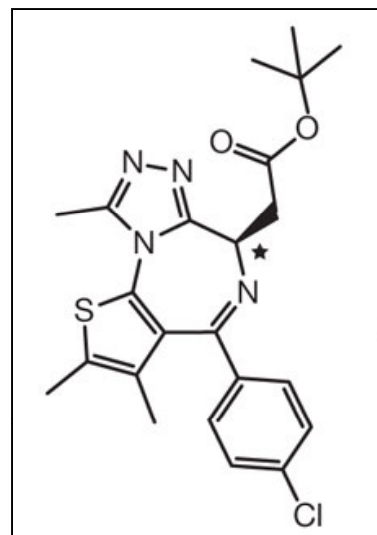

C

I-BET151

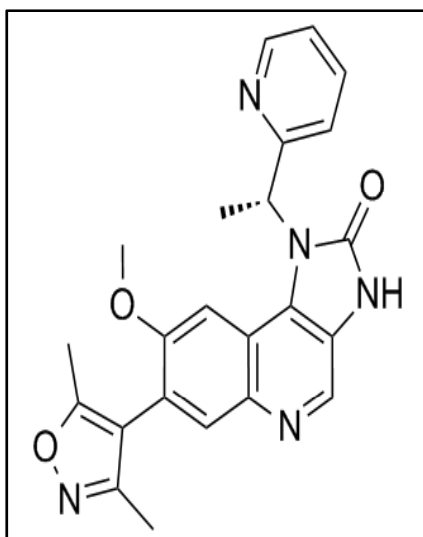

D

panobinostat

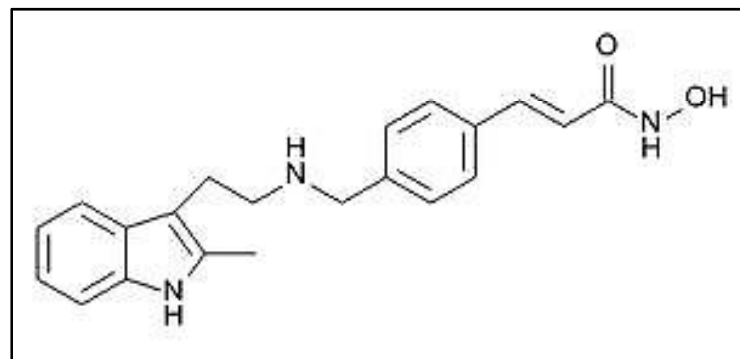

## Supplemental Figure 2

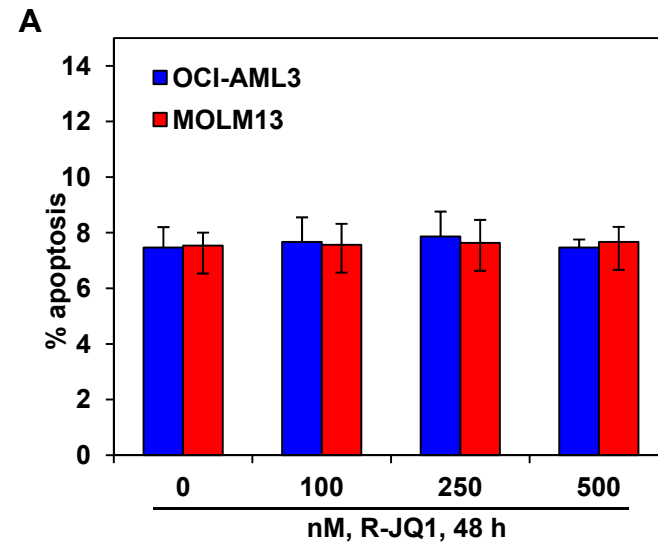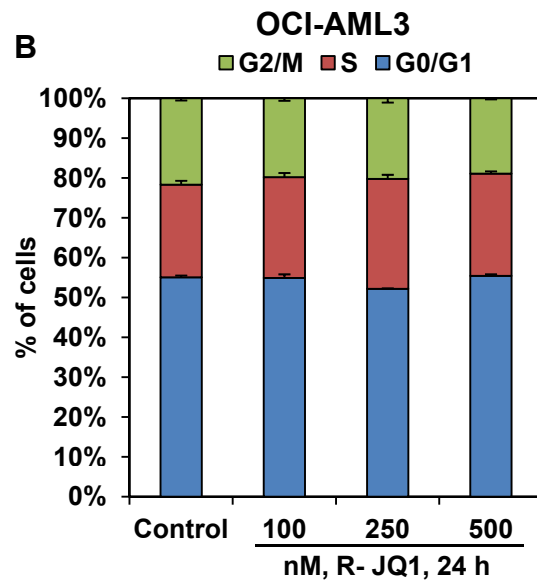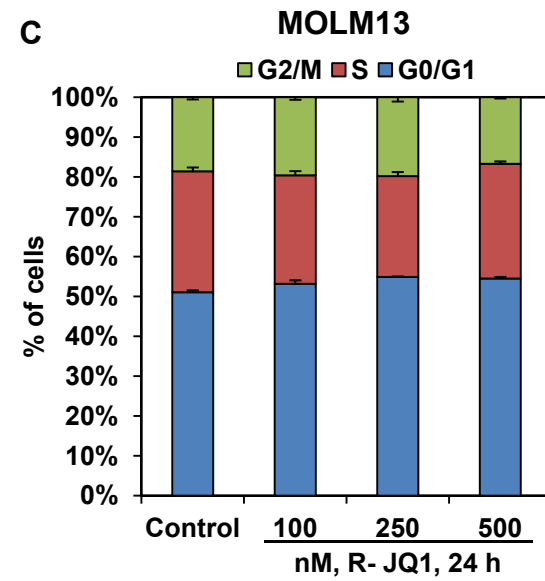

Supplemental Figure 3

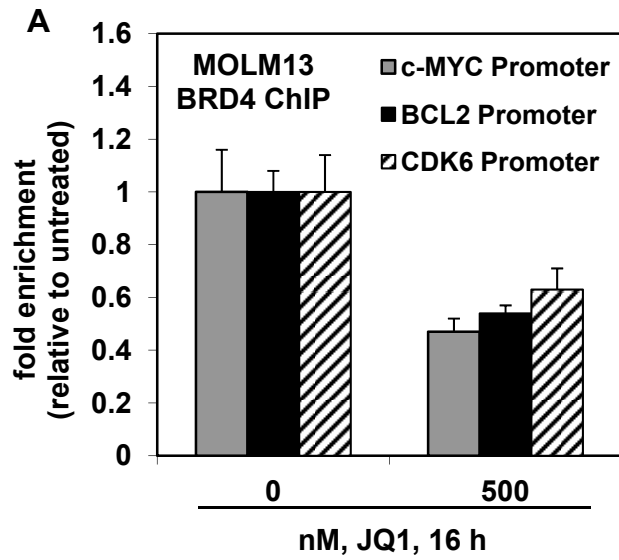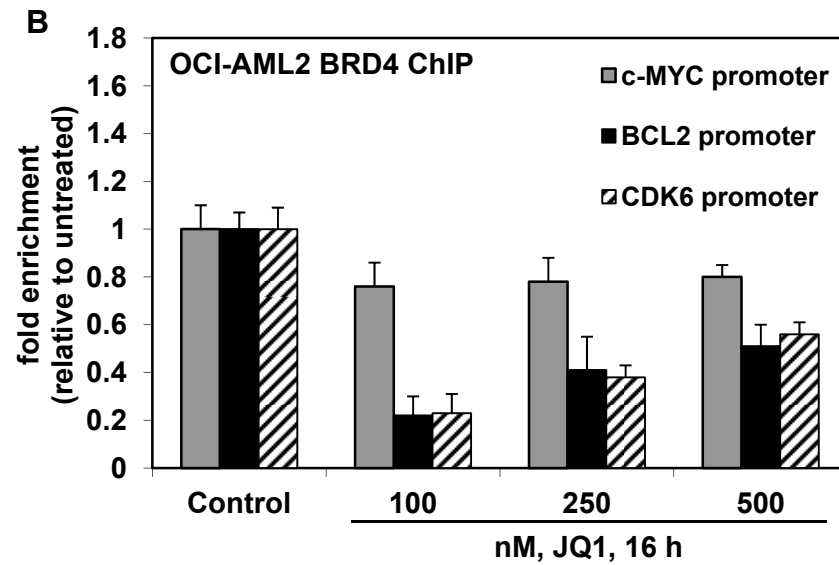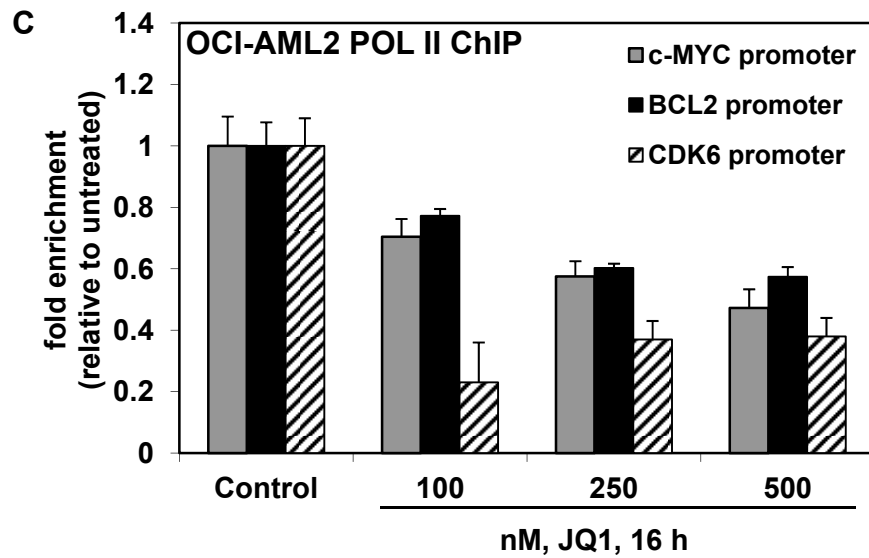

Supplemental Figure 4

A

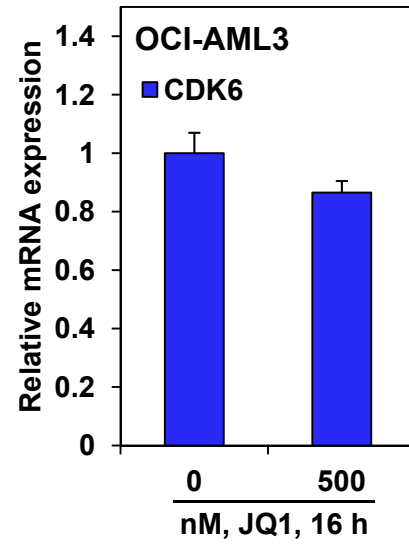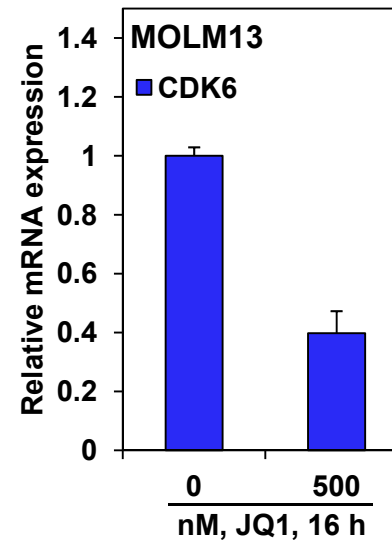

B

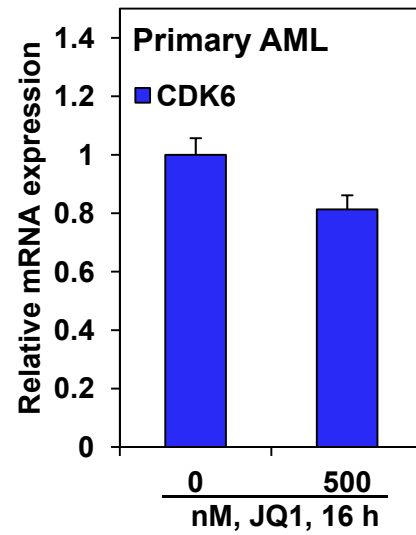

C

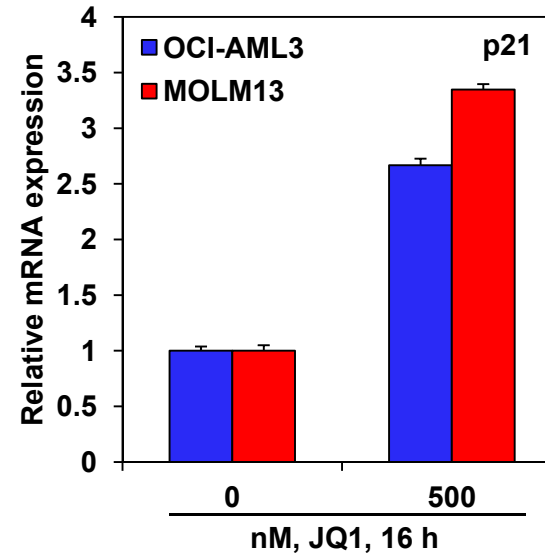

Supplemental Figure 5

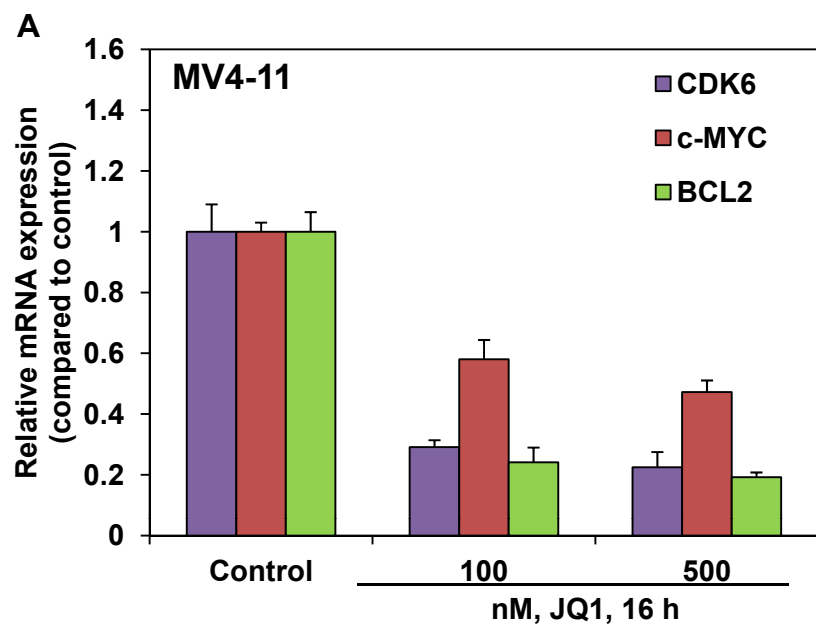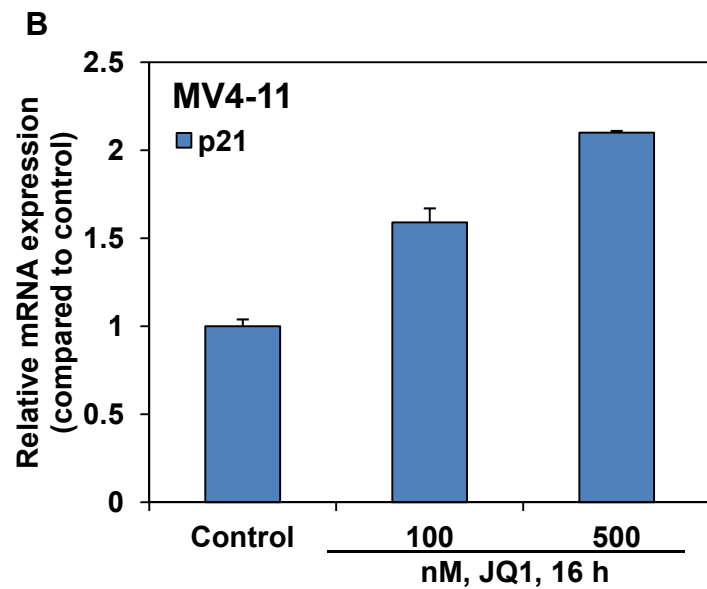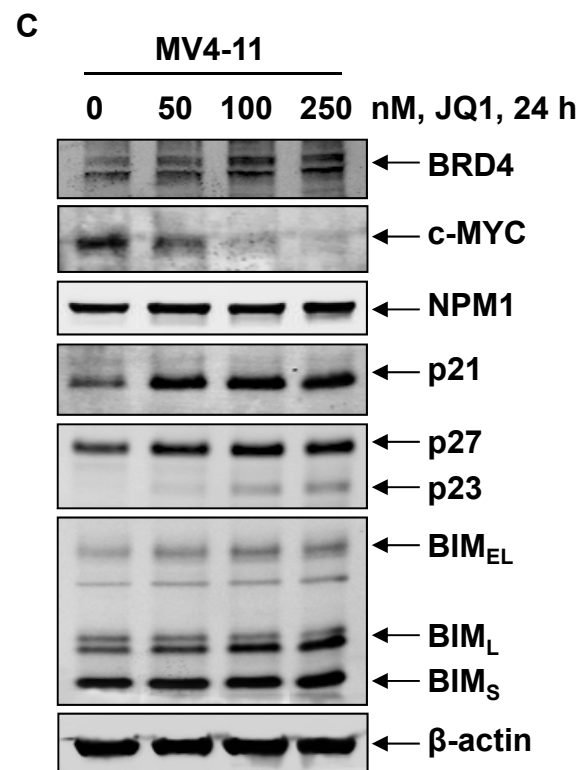

Supplemental Figure 6

**A**

| OCI-AML3 cells |         |                   |       |
|----------------|---------|-------------------|-------|
| JQ1 (nM)       | PS (nM) | Fraction Affected | CI    |
| 50             | 5       | 0.465             | 0.831 |
| 60             | 6       | 0.526             | 0.880 |
| 75             | 7.5     | 0.658             | 0.832 |
| 80             | 8       | 0.743             | 0.723 |
| 90             | 9       | 0.798             | 0.696 |
| 100            | 10      | 0.86              | 0.621 |

  

| MOLM13 cells |         |                   |       |
|--------------|---------|-------------------|-------|
| JQ1 (nM)     | PS (nM) | Fraction Affected | CI    |
| 300          | 6       | 0.734             | 0.786 |
| 350          | 7       | 0.813             | 0.729 |
| 375          | 7.5     | 0.818             | 0.768 |
| 400          | 8       | 0.878             | 0.654 |
| 450          | 9       | 0.867             | 0.771 |
| 500          | 10      | 0.906             | 0.715 |

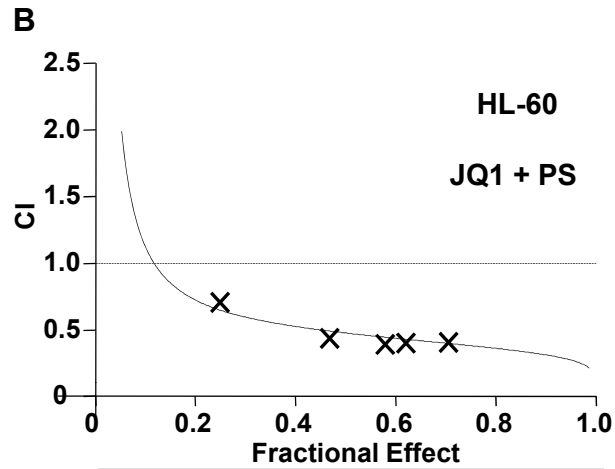

| HL-60    |         |                   |       |
|----------|---------|-------------------|-------|
| JQ1 (nM) | PS (nM) | Fraction Affected | CI    |
| 250      | 5       | 0.244             | 0.727 |
| 300      | 6       | 0.463             | 0.458 |
| 350      | 7       | 0.574             | 0.411 |
| 400      | 8       | 0.615             | 0.426 |
| 500      | 10      | 0.700             | 0.430 |

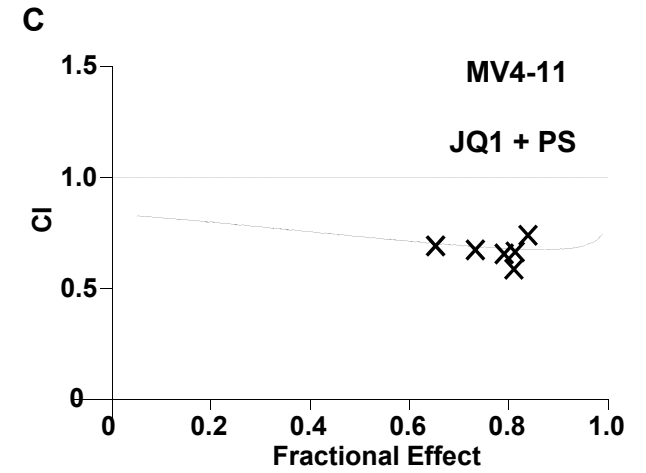

| MV4-11   |         |                   |       |
|----------|---------|-------------------|-------|
| JQ1 (nM) | PS (nM) | Fraction Affected | CI    |
| 120      | 2.4     | 0.647             | 0.709 |
| 150      | 3       | 0.728             | 0.688 |
| 175      | 3.5     | 0.805             | 0.602 |
| 180      | 3.6     | 0.785             | 0.672 |
| 200      | 4       | 0.808             | 0.679 |
| 250      | 5       | 0.834             | 0.755 |

## Supplemental Figure 6

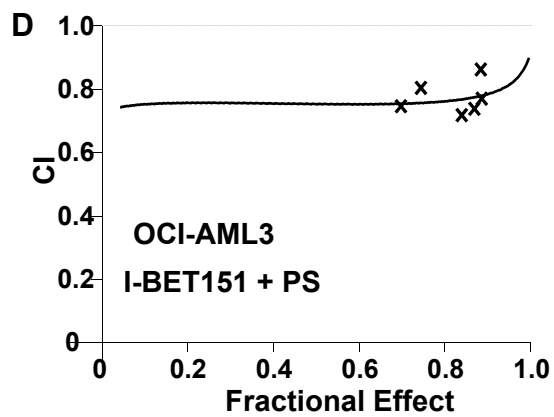

| OCI-AML3      |         |                   |       |
|---------------|---------|-------------------|-------|
| I-BET151 (nM) | PS (nM) | Fraction Affected | CI    |
| 250           | 5       | 0.698             | 0.747 |
| 300           | 6       | 0.745             | 0.805 |
| 350           | 7       | 0.84              | 0.719 |
| 400           | 8       | 0.869             | 0.739 |
| 450           | 9       | 0.887             | 0.770 |
| 500           | 10      | 0.885             | 0.864 |

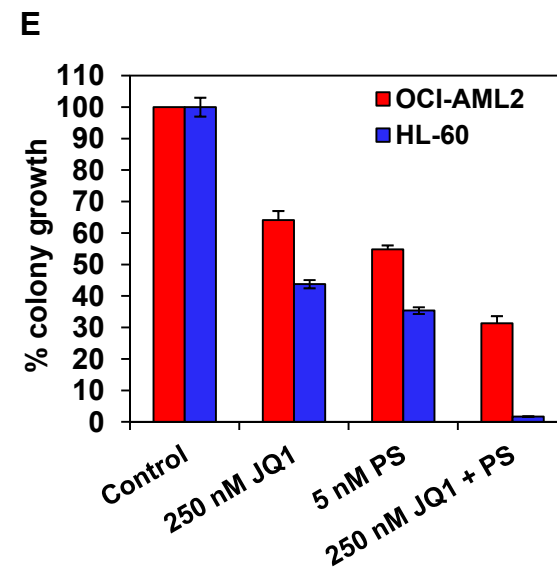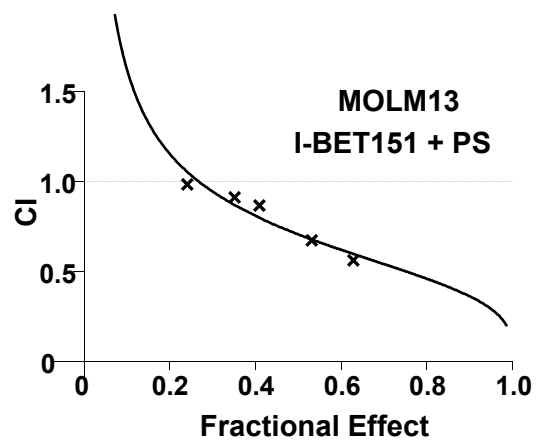

| MOLM13        |         |                   |       |
|---------------|---------|-------------------|-------|
| I-BET151 (nM) | PS (nM) | Fraction Affected | CI    |
| 250           | 5       | 0.242             | 0.984 |
| 350           | 7       | 0.352             | 0.913 |
| 400           | 8       | 0.41              | 0.866 |
| 450           | 9       | 0.532             | 0.676 |
| 500           | 10      | 0.628             | 0.563 |

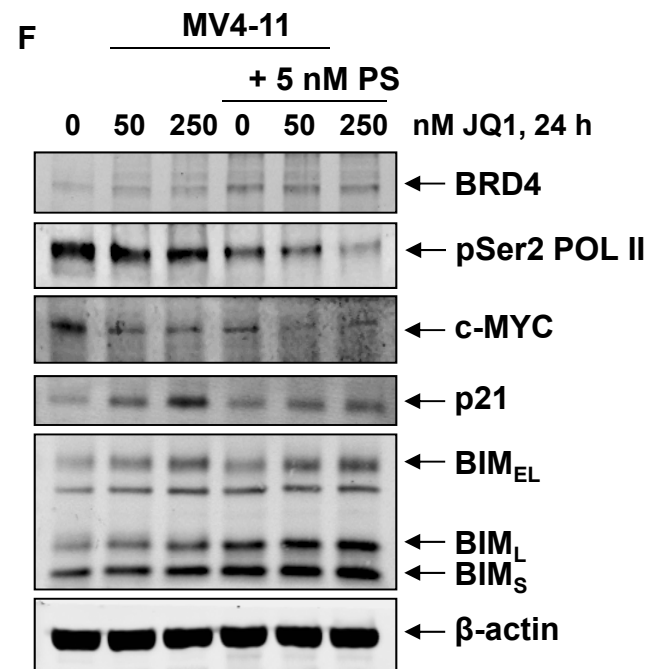

**Supplemental Table 1: Clinical presentation and mutation status of the primary AML samples**

| <b>AML Sample #</b> | <b>Mutation Status</b> | <b>Clinical Presentation</b> |
|---------------------|------------------------|------------------------------|
| 1                   | NPM1c+                 | Newly Diagnosed              |
| 2                   | FLT3-ITD               | Relapsed                     |
| 3                   | FLT3-ITD               | Relapsed                     |
| 4                   | NPM1c+                 | Newly Diagnosed              |
| 5                   | NPM1c+/FLT3-ITD        | Relapsed                     |
| 6                   | FLT3-ITD               | Relapsed                     |
| 7                   | NPM1c+                 | Newly Diagnosed              |
| 8                   | NPM1c+/FLT3-ITD        | Relapsed                     |
| 9                   | NPM1c+                 | Newly Diagnosed              |
| 10                  | NPM1c+/FLT3-ITD        | Relapsed                     |

**Note:** The NPM1 status was determined by quantitative PCR utilizing primers for exon 12 of the NPM1 cDNA. The setup for this PCR utilizes a common forward primer and two separate reverse primers, one that anneals and amplifies wild type NPM1 cDNA and the other which anneals to and amplifies the mutant NPM1 cDNA. The positive control for this qPCR is cDNA amplified from OCI-AML3, an AML cell line known to express mutant NPM1. The negative control is cDNA from HL-60 cells which only express wild type NPM1. For detection of FLT-ITD, total RNA was isolated and converted to cDNA. Exon 14 of FLT3, the location in which internal tandem duplications are known to occur, was amplified by PCR utilizing primers designed to specifically amplify exon 14 of FLT3. Amplified PCR products were resolved on a 2% agarose gel and documented with a UV transilluminator. Primary AML cells exhibiting amplicons that migrate at greater than 366 base pairs (the size of the wild type FLT3 exon 14) are considered to be positive for FLT3-ITD.



**Supplemental Table 2: Fold expression change of the 40 most up (I) and downregulated (II) mRNAs in OCI-AML3 cells following treatment with 500 nM of JQ1 for 8 hours.**

**I.**

| Affy ID     | Gene Name              | Fold Change |
|-------------|------------------------|-------------|
| 214455_at   | HIST1H2BC              | 39.7739     |
| 236193_at   | LOC100506979           | 26.8164     |
| 203455_s_at | SAT1                   | 20.3079     |
| 210592_s_at | SAT1                   | 20.0623     |
| 202708_s_at | HIST2H2BE              | 19.0892     |
| 206110_at   | HIST1H3H               | 18.2425     |
| 214472_at   | HIST1H2AD /// HIST1H3D | 17.9147     |
| 210387_at   | HIST1H2BG              | 16.8808     |
| 215779_s_at | HIST1H2BG              | 15.4988     |
| 232035_at   | LOC100507025           | 14.196      |
| 239146_at   | CLDND1                 | 13.7459     |
| 205352_at   | SERPINI1               | 13.0939     |
| 215071_s_at | HIST1H2AC              | 12.7731     |
| 225842_at   | PHLDA1                 | 12.701      |
| 214657_s_at | NEAT1                  | 11.6615     |
| 204720_s_at | DNAJC6                 | 10.8363     |
| 224566_at   | NEAT1                  | 10.807      |
| 224797_at   | ARRDC3                 | 10.7285     |
| 207156_at   | HIST1H2AG              | 10.2182     |
| 210959_s_at | SRD5A1                 | 10.0011     |
| 234192_s_at | GKAP1                  | 9.83419     |
| 234040_at   | HELLS                  | 9.74844     |
| 201631_s_at | IER3                   | 9.66125     |
| 212724_at   | RND3                   | 9.60692     |
| 214290_s_at | HIST2H2AA3             | 9.34777     |
| 209911_x_at | HIST1H2BD              | 9.20341     |
| 218280_x_at | HIST2H2AA3             | 9.05897     |
| 219371_s_at | KLF2                   | 8.59847     |
| 204748_at   | PTGS2                  | 8.57626     |
| 207046_at   | HIST2H4A               | 8.27043     |
| 217996_at   | PHLDA1                 | 8.15897     |
| 214522_x_at | HIST1H2AD /// HIST1H3D | 7.83386     |
| 231817_at   | USP53                  | 7.74812     |
| 214469_at   | HIST1H2AE              | 7.7153      |
| 202814_s_at | HEXIM1                 | 7.69271     |
| 221986_s_at | KLHL24                 | 7.68113     |
| 205308_at   | FAM164A                | 7.62144     |
| 225571_at   | LIFR                   | 7.59786     |
| 203158_s_at | GLS                    | 7.53654     |
| 201242_s_at | ATP1B1                 | 7.39546     |

**II.**

| Affy ID      | Gene Name         | Fold Change |
|--------------|-------------------|-------------|
| 206978_at    | CCR2              | -63.058     |
| 219714_s_at  | CACNA2D3          | -44.324     |
| 203887_s_at  | THBD              | -30.521     |
| 207725_at    | POU4F2            | -24.837     |
| 223204_at    | FAM198B           | -23.918     |
| 203477_at    | COL15A1           | -21.253     |
| 1553849_at   | CCDC26            | -20.941     |
| 203888_at    | THBD              | -18.922     |
| 214920_at    | THSD7A            | -17.291     |
| 210147_at    | ART3              | -16.552     |
| 227265_at    | FGL2              | -16.531     |
| 204470_at    | CXCL1             | -16.206     |
| 202664_at    | WIPF1             | -14.686     |
| 206067_s_at  | WT1               | -13.054     |
| 204430_s_at  | SLC2A5            | -12.709     |
| 226517_at    | BCAT1             | -12.685     |
| 229159_at    | THSD7A            | -12.643     |
| 206304_at    | MYBPH             | -12.499     |
| 224356_x_at  | MS4A6A            | -12.371     |
| 221648_s_at  | LOC100507192      | -12.367     |
| 209960_at    | HGF               | -12.229     |
| 1557411_s_at | SLC25A43          | -11.977     |
| 221748_s_at  | TNS1              | -11.73      |
| 223343_at    | MS4A7             | -11.464     |
| 243601_at    | LOC285957         | -11.374     |
| 230550_at    | MS4A6A            | -11.062     |
| 225021_at    | ZNF532            | -11.02      |
| 210279_at    | GPR18             | -10.9       |
| 213894_at    | THSD7A            | -10.89      |
| 216950_s_at  | FCGR1A /// FCGR1C | -10.864     |
| 223344_s_at  | MS4A7             | -10.564     |
| 216598_s_at  | CCL2              | -10.266     |
| 214511_x_at  | FCGR1B            | -10.246     |
| 223828_s_at  | LGALS12           | -10.191     |
| 239529_at    | C5orf20           | -10.175     |
| 230008_at    | THSD7A            | -10.136     |
| 225285_at    | BCAT1             | -9.5322     |
| 212224_at    | ALDH1A1           | -9.4788     |
| 202431_s_at  | MYC               | -9.4328     |
| 219666_at    | MS4A6A            | -9.2174     |

**Supplemental Table 3: Ingenuity Pathway Analysis of the 5 most perturbed networks in OCI-AML3 following treatment with 500 nM of JQ1 for 8 hours.**

| <b>Top 5 most perturbed networks in OCI-AML3</b>                                                             | <b>Score</b> |
|--------------------------------------------------------------------------------------------------------------|--------------|
| <b>Infectious Disease, Respiratory Disease, Neurological Disease</b>                                         | <b>36</b>    |
| <b>Cellular Movement, Hematological System Development and Function, Immune Cell Trafficking</b>             | <b>31</b>    |
| <b>Cellular Development, Cellular Growth and Proliferation, Reproductive System Development and Function</b> | <b>29</b>    |
| <b>Drug Metabolism, Molecular Transport, Small Molecule Biochemistry</b>                                     | <b>24</b>    |
| <b>Nervous System Development and Function, Cell-To-Cell Signaling and Interaction, Tissue Development</b>   | <b>17</b>    |

**Note: Ingenuity Pathway Analysis (IPA) was performed utilizing gene expression changes from 80 mRNA targets (40 most up regulated and 40 most down regulated mRNAs) identified by microarray expression analysis. A Score was assigned by IPA for each network. The score assigned by IPA for the associated network functions (i.e. a score of 36) indicates that there is a 1 in  $10^{36}$  chance that the focus genes in the dataset are together in a network due to random chance alone.**
